# Supplementary material for: Antibody Tests in Detecting SARS-CoV-2 Infection: A Meta-Analysis
Source: Diagnostics (Basel). 2020 May 19;10(5):319. doi: 10.3390/diagnostics10050319 (PMC7278002; doi:10.3390/diagnostics10050319)

**Supplementary Table 1: The QUADAS tool**

| Item                                                                                                                                                               | Yes    | No    | Unclear |
|--------------------------------------------------------------------------------------------------------------------------------------------------------------------|--------|-------|---------|
| 1. Was the spectrum of patients representative of the patients who will receive the test in practice?                                                              | ( 38 ) | (-)   | (-)     |
| 2. Were selection criteria clearly described?                                                                                                                      | ( 38 ) | (-)   | (-)     |
| 3. Is the reference standard likely to correctly classify the target condition?                                                                                    | ( 38 ) | (-)   | (-)     |
| 4. Is the time period between reference standard and index test short enough to be reasonably sure that the target condition did not change between the two tests? | ( 31 ) | (-)   | ( 7 )   |
| 5. Did the whole sample or a random selection of the sample, receive verification using a reference standard of diagnosis?                                         | ( 38 ) | (-)   | (-)     |
| 6. Did patients receive the same reference standard regardless of the index test result?                                                                           | ( 36 ) | ( 2 ) | (-)     |
| 7. Was the reference standard independent of the index test (i.e., the index test did not form part of the reference standard)?                                    | ( 38 ) | (-)   | (-)     |
| 8. Was the execution of the index test described in sufficient detail to permit replication of the test?                                                           | ( 38 ) | (-)   | (-)     |
| 9. Was the execution of the reference standard described in sufficient detail to permit its replication?                                                           | ( 38 ) | (-)   | (-)     |
| 10. Were the index test results interpreted without knowledge of the results of the reference standard?                                                            | ( 36 ) | (-)   | ( 2 )   |
| 11. Were the reference standard results interpreted without knowledge of the results of the index test?                                                            | ( 38 ) | (-)   | (-)     |
| 12. Were the same clinical data available when test results were interpreted as would be available when the test is used in practice?                              | ( 38 ) | (-)   | (-)     |
| 13. Were uninterpretable/ intermediate test results reported?                                                                                                      | ( 38 ) | (-)   | (-)     |
| 14. Were withdrawals from the study explained?                                                                                                                     | ( 38 ) | (-)   | (-)     |

Whiting P, Rutjes AW, Reitsma JB, et al. The development of QUADAS: a tool for the quality assessment of studies of diagnostic accuracy included in systematic reviews. BMC Med Res Methodol 2003;3:25

**Supplementary Table 2: The Quadas Tool 2**

|          | Bias              |            |                    |                 | Applicability     |            |                    |
|----------|-------------------|------------|--------------------|-----------------|-------------------|------------|--------------------|
|          | PATIENT SELECTION | INDEX TEST | REFERENCE STANDARD | FLOW AND TIMING | PATIENT SELECTION | INDEX TEST | REFERENCE STANDARD |
| Study 1  | Low               | Low        | Low                | Low             | Low               | Low        | Low                |
| Study 2  | Low               | Low        | Low                | Low             | Low               | Low        | Low                |
| Study 3  | Low               | High       | Low                | Unclear         | Low               | High       | Low                |
| Study 4  | Low               | Low        | Low                | Low             | Low               | Low        | Low                |
| Study 5  | Low               | Low        | Low                | Low             | Low               | Low        | Low                |
| Study 6  | Low               | Low        | Low                | Low             | Low               | Low        | Low                |
| Study 7  | Low               | Low        | Low                | Low             | Low               | Low        | Low                |
| Study 8  | Low               | Low        | Low                | Low             | Low               | Low        | Low                |
| Study 9  | Low               | Low        | Low                | Low             | Low               | Low        | Low                |
| Study 10 | Low               | Unclear    | Low                | High            | Low               | Unclear    | Low                |
| Study 11 | Low               | Unclear    | Low                | High            | Low               | Unclear    | Low                |
| Study 12 | Low               | Low        | Low                | Low             | Low               | Low        | Low                |
| Study 13 | Low               | Low        | Low                | Low             | Low               | Low        | Low                |
| Study 14 | Low               | Low        | Low                | Low             | Low               | Low        | Low                |
| Study 15 | Low               | Low        | Low                | Low             | Low               | Low        | Low                |
| Study 16 | Low               | High       | Low                | Low             | Low               | High       | Low                |
| Study 17 | Low               | Low        | Low                | Low             | Low               | Low        | Low                |
| Study 18 | Low               | High       | Low                | Low             | Low               | High       | Low                |
| Study 19 | Low               | Low        | Low                | Low             | Low               | Low        | Low                |
| Study 20 | Low               | Low        | Low                | Low             | Low               | Low        | Low                |
| Study 21 | Low               | Low        | Low                | Low             | Low               | Low        | Low                |
| Study 22 | Low               | Low        | Low                | Low             | Low               | Low        | Low                |
| Study 23 | Low               | Low        | Low                | Low             | Low               | Low        | Low                |
| Study 24 | Low               | Low        | Low                | Low             | Low               | Low        | Low                |
| Study 25 | Low               | Low        | Low                | Low             | Low               | Low        | Low                |
| Study 26 | Low               | High       | Low                | Low             | Low               | High       | Low                |
| Study 27 | Low               | High       | Low                | Low             | Low               | High       | Low                |
| Study 28 | Low               | Low        | Low                | Low             | Low               | Low        | Low                |
| Study 29 | Low               | Low        | Low                | Low             | Low               | Low        | Low                |
| Study 30 | Low               | Low        | Low                | Low             | Low               | Low        | Low                |
| Study 31 | Low               | Low        | Low                | Low             | Low               | Low        | Low                |
| Study 32 | Low               | Low        | Low                | Low             | Low               | Low        | Low                |
| Study 33 | Low               | High       | Low                | Low             | Low               | High       | Low                |
| Study 34 | Low               | Low        | Low                | Low             | Low               | Low        | Low                |
| Study 35 | Low               | Unclear    | Low                | Low             | Low               | Unclear    | Low                |
| Study 36 | Low               | Low        | Low                | Low             | Low               | Low        | Low                |
| Study 37 | Low               | Low        | Low                | Low             | Low               | Low        | Low                |
| Study 38 | Low               | High       | Low                | Low             | Low               | High       | Low                |

Supplementary Figure 1: The Quadras Tool 2 graph

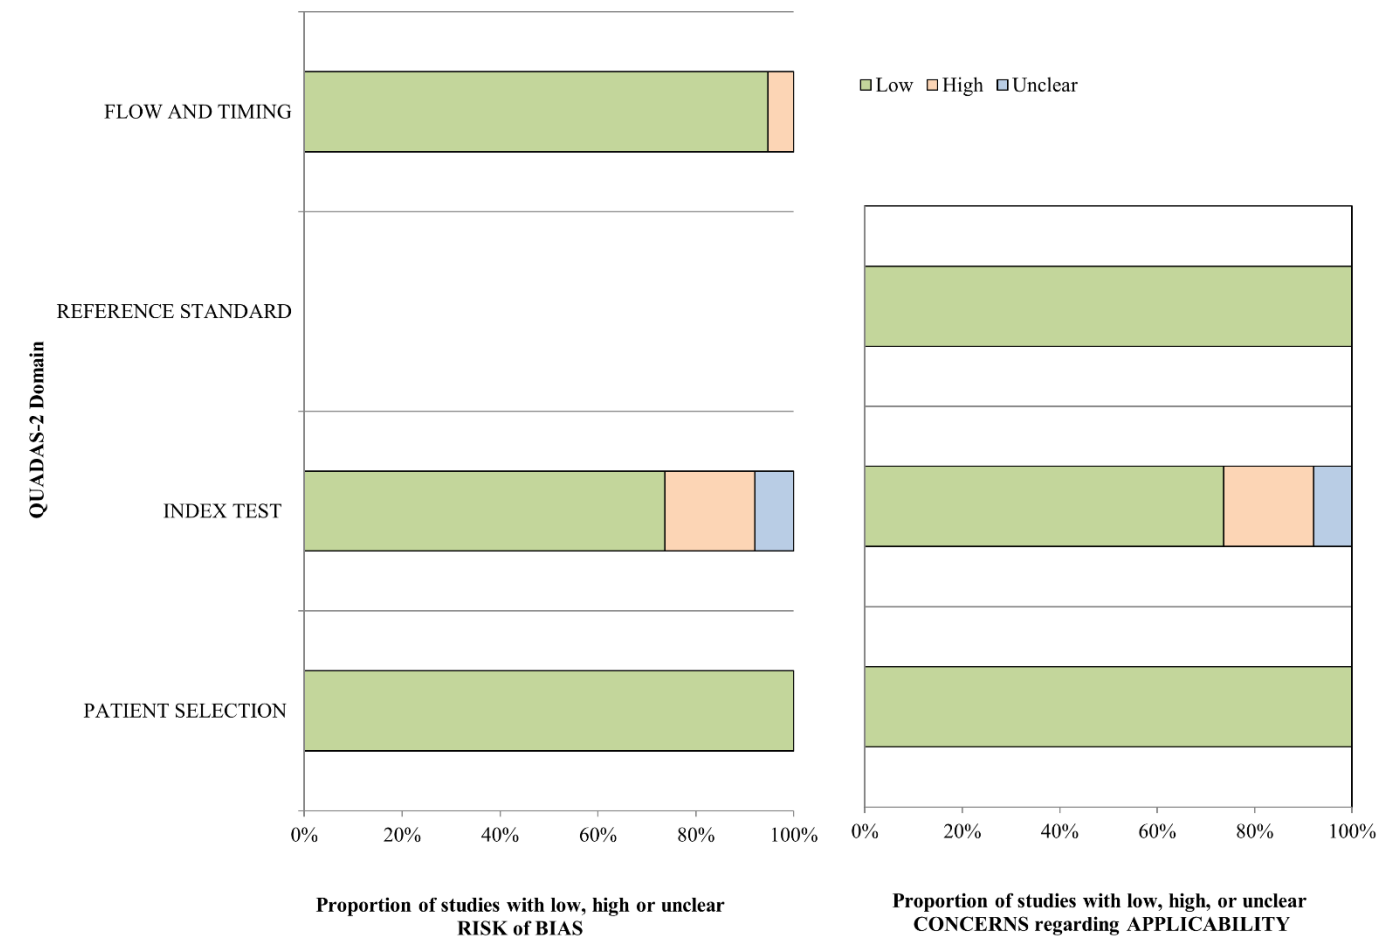

Supplement: Supplementary file 1 [file diagnostics-10-00319-s001.pdf]
